# Supplementary material for: Structure guided mimicry of an essential P. falciparum receptor-ligand complex enhances cross neutralizing antibodies
Source: PubMed Central journal article supplement (PMC10514071; doi:10.1038/s41467-023-41636-5), 2023-09-21
Supplement: 41467_2023_41636_MOESM1_ESM.pdf [file 41467_2023_41636_MOESM1_ESM.pdf]

1 **Supplementary Figure 1.** (A) Sequence alignment of Fusion-F<sub>D12</sub> and Fusion-R<sub>D12</sub> chimeric  
2 proteins. The RON2L sequence in Fusion-F<sub>D12</sub> and Fusion-R<sub>D12</sub> are placed in the forward or  
3 reverse direction with respect to the AMA1 sequence and joined by linkers that connect them to  
4 the DII loop of AMA1. (B) Sequence alignment of HP41 and 3D7 AMA1-RON2L fusion  
5 proteins. Differences between the two proteins are highlighted red. The residues comprising the  
6 1a, 1bcd, 1e, and 1f binding loops and the inserted RON2L sequence are highlighted.

7  
8 **Supplementary Figure 2. Biochemical and structural characterization of chimera Fusion-**  
9 **F<sub>D12</sub>.** (A) Coomassie stained SDS-PAGE gel of AMA1<sub>D12</sub> and Fusion-F<sub>D12</sub> recombinant proteins.  
10 Red: reduced, NR: non-reduced. (B) Western blot analysis of AMA1<sub>D12</sub> and Fusion-F<sub>D12</sub> proteins  
11 using conformation-dependent AMA1 mAbs 1F9 and 4G2 that bind AMA1 loop 1d and DII  
12 respectively. Removing DII loop of AMA1 to generate the fusion chimera negates mAb 4G2  
13 binding while 1F9 epitope is still preserved. (C) Coomassie stained SDS-PAGE gel of AMA1<sub>D12</sub>  
14 and Fusion-R<sub>D12</sub> recombinant proteins. Red: reduced, NR: non-reduced. (D) Western blot  
15 analysis of AMA1<sub>D12</sub> and Fusion-R<sub>D12</sub> proteins using conformation-dependent AMA1 mAbs 1F9  
16 and 4G2. Both antibodies did not bind Fusion-R<sub>D12</sub>. (E) RON2L-Fc (1μg/mL) was used to test  
17 binding to recombinant 3D7AMA1<sub>D12</sub>, Fusion-F<sub>D12HP41</sub> and Fusion-R<sub>D12HP41</sub> proteins.  
18 3D7AMA1<sub>D12</sub> and Fusion-R<sub>D12HP41</sub> but not Fusion-F<sub>D12HP41</sub> bound to free RON2L. Data shown  
19 are mean±SEM of OD405 performed in three technical replicates. (F) RON2L-Fc binding to  
20 3D7AMA1<sub>D12</sub> but not Fusion-F<sub>D123D7</sub>. Data shown are mean±SEM of OD405 performed in three  
21 technical replicates. (G) Right: Secondary structure view of Fusion-F<sub>D12</sub> with boxes indicating  
22 the regions where the chimeric PfRON2L peptide begins and terminates. Left: Zoomed in  
23 orthogonal views of the PfAMA1-PfRON2L contacts showing the successful fusion of the

24 PfAMA1 with PfRON2L. Few residues of both PfAMA1 and PfRON2L are indicated in ball and  
25 sticks for clarity.

26

27 **Supplementary Figure 3. Antibody titer in purified IgG or serum of apoAMA1,**

28 **AMA1+RON2L binary complex and Fusion-F<sub>D12</sub> immunized animals.** (A) Antibody titer

29 against 3D7AMA1, Fusion-F<sub>D12</sub>, or FVOAMA1 antibody in the purified IgG from animals

30 immunized with the indicated antigens in AddaVax and Freund's adjuvants. Data are shown for

31 individual animals (n=4-5 per group) and each data point is the average of three replicates.

32 Horizontal lines show the mean titer within each group. (B) Antibody titer against 3D7AMA1,

33 Fusion-F<sub>D12</sub>, or FVOAMA1 in the serum of animals immunized with the indicated antigens in

34 AddaVax and Freund's adjuvants. Data are shown for individual animals (n=5 per group) and

35 each data point is the average of three replicates. Horizontal lines show the mean titer within

36 each group. (C, D) Anti-3D7 AMA1 titer in the purified IgG from the three independent

37 immunization studies using Friends or AddaVax adjuvants. Log<sub>10</sub> transformed titer was used to

38 compare IgG between apoAMA1<sub>D12</sub> (C) and Fusion-F<sub>D12</sub> (D) immunized animals. Brown-

39 Forsythe and Welch ANOVA test was performed to compare differences between groups.

40 Horizontal lines show the mean antibody titer in each group. (E, F) Anti-3D7 AMA1 titer in the

41 serum from two independent immunization studies using Friends or AddaVax adjuvants. Log<sub>10</sub>

42 transformed titer was used to compare antibody titer between apoAMA1<sub>D12</sub> (E) and Fusion-F<sub>D12</sub>

43 (F) immunized animals. Brown-Forsythe and Welch ANOVA test was performed to compare

44 differences between groups. Horizontal lines show the mean antibody titer in each group.

45

46 **Supplementary Figure 4: Antibody titer and neutralizing activity of purified IgG from**  
47 **apoAMA1, binary complex (AMA1+RON2L) and Fusion-F<sub>D12</sub> immunized animals.** (A) *In*  
48 *vitro* neutralization (1-cycle) assay against vaccine-type Pf3D7 parasites using 2mg/mL of total  
49 IgG from each animal. Data are shown for individual animals (n=4 per group) and each data  
50 point is the average of three replicates. Horizontal lines show the mean neutralizing activity in  
51 each group. Brown-Forsythe and Welch ANOVA test was performed to compare differences  
52 between groups. (B) AMA1-specific antibody titers in purified IgG from animals immunized  
53 with 3D7apoAMA1<sub>D12</sub> (blue square), 3D7AMA1<sub>D12</sub>+RON2L binary complex (green circle), and  
54 Fusion-F<sub>D12</sub>HP41 (purple triangle) immunized rats in Freund's adjuvant. Data are shown for  
55 individual animals (n=4 per group) and each data point is the average of three replicates.  
56 Horizontal lines show the mean antibody titer in each group. Brown-Forsythe and Welch  
57 ANOVA test was performed to compare differences between groups. (C) Proportion of IgG  
58 binding to non-vaccine type FVOAMA1 to vaccine-type 3D7AMA1. Data are shown for  
59 individual animals (n=4 per group) and each data point is the average of three replicates.  
60 Horizontal line marks the mean for each group. One-way ANOVA was performed to compare  
61 differences between groups.

62

63 **Supplementary Figure 5. Parasite neutralization assay using IgG and serum.** (A)  
64 Relationship between anti-AMA1 antibody titer in serum (x-axis) and neutralizing (2-cycle)  
65 activity in 2% serum (y-axis) between Fusion-F<sub>D12</sub> (purple triangle) and apoAMA1<sub>D12</sub> (blue  
66 square) antigens in Freund's adjuvant. Each data point is the average of two replicates. (B) Left  
67 panel: proportion of IgG1 to IgG2a AMA1-specific antibodies in rat sera of Fusion-F<sub>D12</sub> (purple)  
68 relative to apoAMA1<sub>D12</sub> (blue) immunized animals in the AddaVax groups. Data shown are

69 mean $\pm$ SEM (n = 5 per group) performed in duplicate. Right panel: proportion of IgG1 to IgG2a  
70 Fusion-F<sub>D12</sub>-specific antibodies in rat sera of Fusion-F<sub>D12</sub> (purple) relative to apoAMA1<sub>D12</sub> (blue)  
71 immunized animals in the AddaVax group. Data are mean $\pm$ SEM (n = 4 per group). Welch's t-  
72 test was performed to compare differences between groups. (C) Left panel: Proportion of IgG1 to  
73 IgG2a AMA1-specific antibodies in rat sera of Fusion-F<sub>D12</sub> (purple) relative to apoAMA1<sub>D12</sub>  
74 (blue) immunized animals in the Freund's group. Data shown are mean $\pm$ SEM (n = 5 per group).  
75 Right panel: Proportion of Fusion-F<sub>D12</sub> vs apoAMA1<sub>D12</sub> specific IgM type antibodies in the sera  
76 of Fusion-F<sub>D12</sub> (purple) relative to apoAMA1<sub>D12</sub> (blue) immunized animals in the Freund's  
77 group. Data are mean $\pm$ SEM (n = 5 per group). Welch's t-test was performed to compare  
78 differences between groups. (D) Anti-RON2L-specific IgG titer in serum of apoAMA1<sub>D12</sub> (blue)  
79 or Fusion-F<sub>D12</sub> (purple) antigen immunized animals in Freund's adjuvant. Data shown are  
80 mean $\pm$ SEM (n = 5 per group. In all experiments the average of technical replicates for each  
81 animal was used for analysis. Welch's t-test was performed to compare differences between  
82 groups. (E) IgA titer in serum of apoAMA1<sub>D12</sub> (blue) or Fusion-F<sub>D12</sub> (purple) antigen immunized  
83 animals in Freund's adjuvant. Data shown are mean $\pm$ SEM (n = 5 per group. In all experiments  
84 the average of two technical replicates for each animal was used for analysis. Welch's t-test was  
85 performed to compare differences between groups.

86

87 **Supplementary Figure 6. Antibody type and isotype differences between apoAMA1<sub>D12</sub> and**  
88 **Fusion-F<sub>D12</sub> immunized rat serum and parasite neutralizing activity.** (A) ELISA OD<sub>450</sub> after  
89 AMA1 titer normalization of IgG from apoAMA1<sub>D12</sub> and Fusion-F<sub>D12</sub> groups (n=5 per group)  
90 used in Fig 3B, Fig 4A-4C, 4F. (B) Comparison of 1-cycle vs 2-cycle parasite neutralization  
91 assay. Spearman's rank test (rS) was performed to analyze correlation between the two assays.

# Suppl Fig 1

**A**

Fusion-F<sub>D12</sub> NYMGNPWTEYMAKYDIEEVHGSGIRVDLGEDAEVAGTQYRLPSGKCPVFGKGI I IENSKT  
 Fusion-R<sub>D12</sub> NYMGNPWTEYMAKYDIEEVHGSGIRVDLGEDAEVAGTQYRLPSGKCPVFGKGI I IENSKT

Fusion-F<sub>D12</sub> TFLTPVATGNQYLKDGGFAPFPTEPLMSPMTLDDMRLLYKDNEVDKNLDELTLCSRHAGN  
 Fusion-R<sub>D12</sub> TFLTPVATGNQYLKDGGFAPFPTEPLMSPMTLDDMRLLYKDNEVDKNLDELTLCSRHAGN

Fusion-F<sub>D12</sub> MIPDNDKNSNYKYPVYDDKDKKCHILY IAAQENNGPRYCNKDESKRNSMFCFRPAKDIS  
 Fusion-R<sub>D12</sub> MIPDNDKNSNYKYPVYDDKDKKCHILY IAAQENNGPRYCNKDESKRNSMFCFRPAKDIS

Fusion-F<sub>D12</sub> FQNLVYLSKNVVHNWEKVCPRKNLQNAKFGLWVDGNCEDI PHVNEFSANDLFECKNLVFE  
 Fusion-R<sub>D12</sub> FQNLVYLSKNVVHNWEKVCPRKNLQNAKFGLWVDGNCEDI PHVNEFSANDLFECKNLVFE

Fusion-F<sub>D12</sub> LSASDQPKQYEQHLTQQAKDIGAGPVASCFTTRMSPPQOICLNSVVNTALSGGSGGGNAA  
 Fusion-R<sub>D12</sub> LSASDQPKQYEQHLGGSGG--GGGSLATNVVSNLCIQPPSMRTTFCSAVPG-----AG

Fusion-F<sub>D12</sub> MIKSAFLPTGAFKADRYKSHGKGYNWGNNTETQKCEIFNVKPTCLINDKNYIATTALSH  
 Fusion-R<sub>D12</sub> IDKAQQGGSGGGGGDRYKSHGKGYNWGNNTETQKCEIFNVKPTCLINDKNYIATTALSH

Fusion-F<sub>D12</sub> PIEVEAAA  
 Fusion-R<sub>D12</sub> PIEVEAAA

**B**

HP41-RON2L -----NYMGNPWTEYMAKYDIEEVHGSGIRVDLGEDAEVAGTQYRL  
 3D7-RON2L -----NYMGNPWTEYMAKYDIEEVHGSGIRVDLGEDAEVAGTQYRL

HP41-RON2L PSGKCPVFGKGI I IENSKTTFLTPVATGNQYLKDGGFAPFPTEPLMSPMTLD**DMRLL**YKD  
 3D7-RON2L PSGKCPVFGKGI I IENSKTTFLTPVATGNQYLKDGGFAPFPTEPLMSPMTLD**EMRHF**YKD

HP41-RON2L **NED**VKNLDELTLCSRHAGNMIPDNDKNSNYKYPVYDDKDKKCHILY IAAQENNGPRYCN  
 3D7-RON2L **NKY**VKNLDELTLCSRHAGNMIPDNDKNSNYKYPVYDDKDKKCHILY IAAQENNGPRYCN

HP41-RON2L KDESKRNSMFCFRPAKDISFQNLVYLSKNVV**H**NWEKVCPRKNLQNAKFGLWVDGNCEDI P  
 3D7-RON2L KDESKRNSMFCFRPAKDISFQNLVYLSKNVV**D**NWEKVCPRKNLQNAKFGLWVDGNCEDI P

HP41-RON2L HVNEF**SAN**DLFECNKLVFELSASDQPKQYEQHLTQQAKDIGAGPVASCFTTRMSPPQOIC  
 3D7-RON2L HVNEF**PAI**DLFECNKLVFELSASDQPKQYEQHLTQQAKDIGAGPVASCFTTRMSPPQOIC

HP41-RON2L LNSVVNTALSGGSGGGNA**A**MIKSAFLPTGAFKADRYKSHGKGYNWGNNTETQKCEIFNV  
 3D7-RON2L LNSVVNTALSGGSGGGNA**S**MIKSAFLPTGAFKADRYKSHGKGYNWGNNTETQKCEIFNV

HP41-RON2L KPTCLINDKNYIATTALSHPIEVE-----  
 3D7-RON2L KPTCLINDKNYIATTALSHPIEVE-----

## Suppl Fig 2

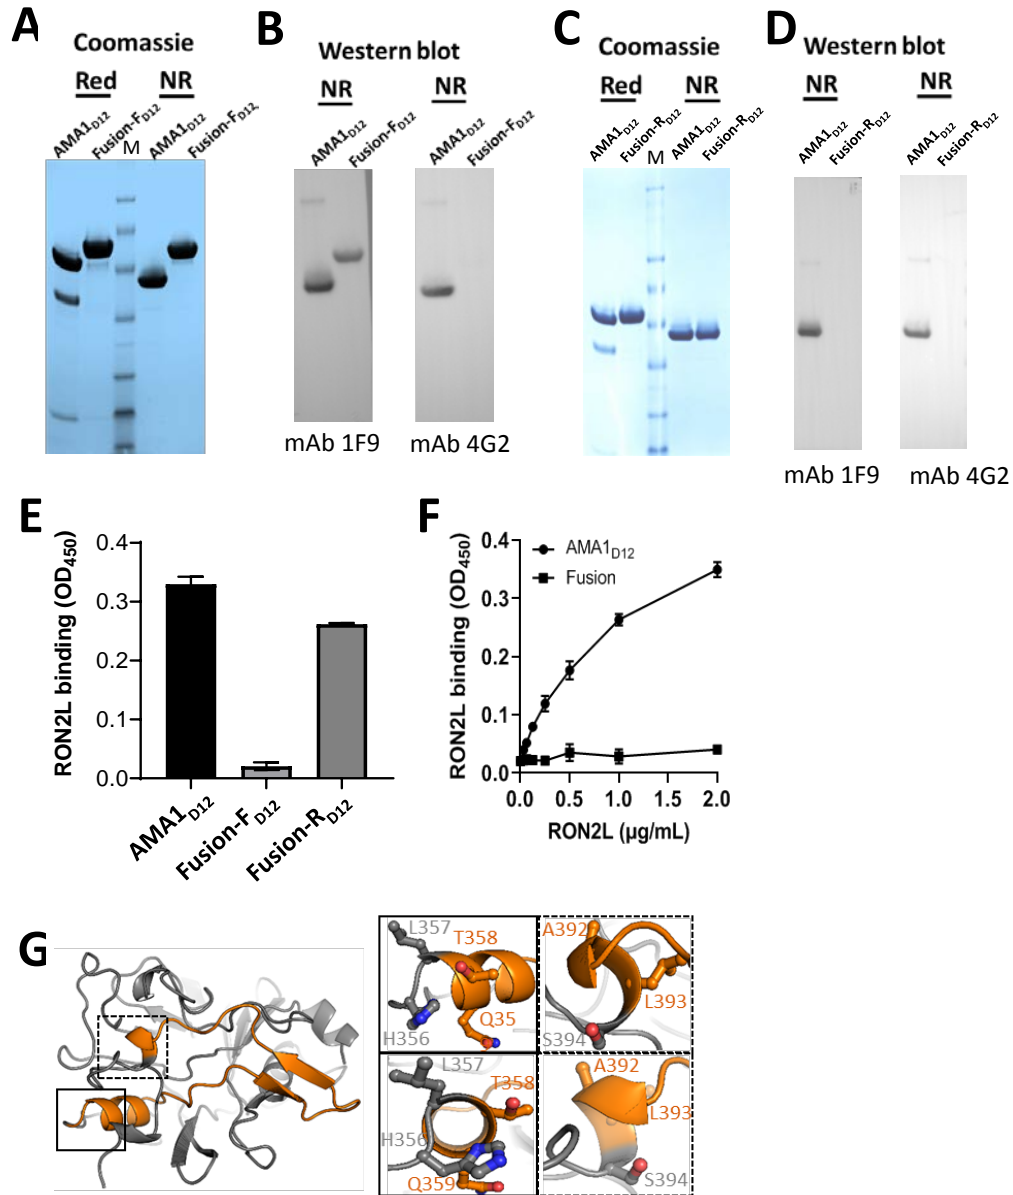

# Suppl Fig 3

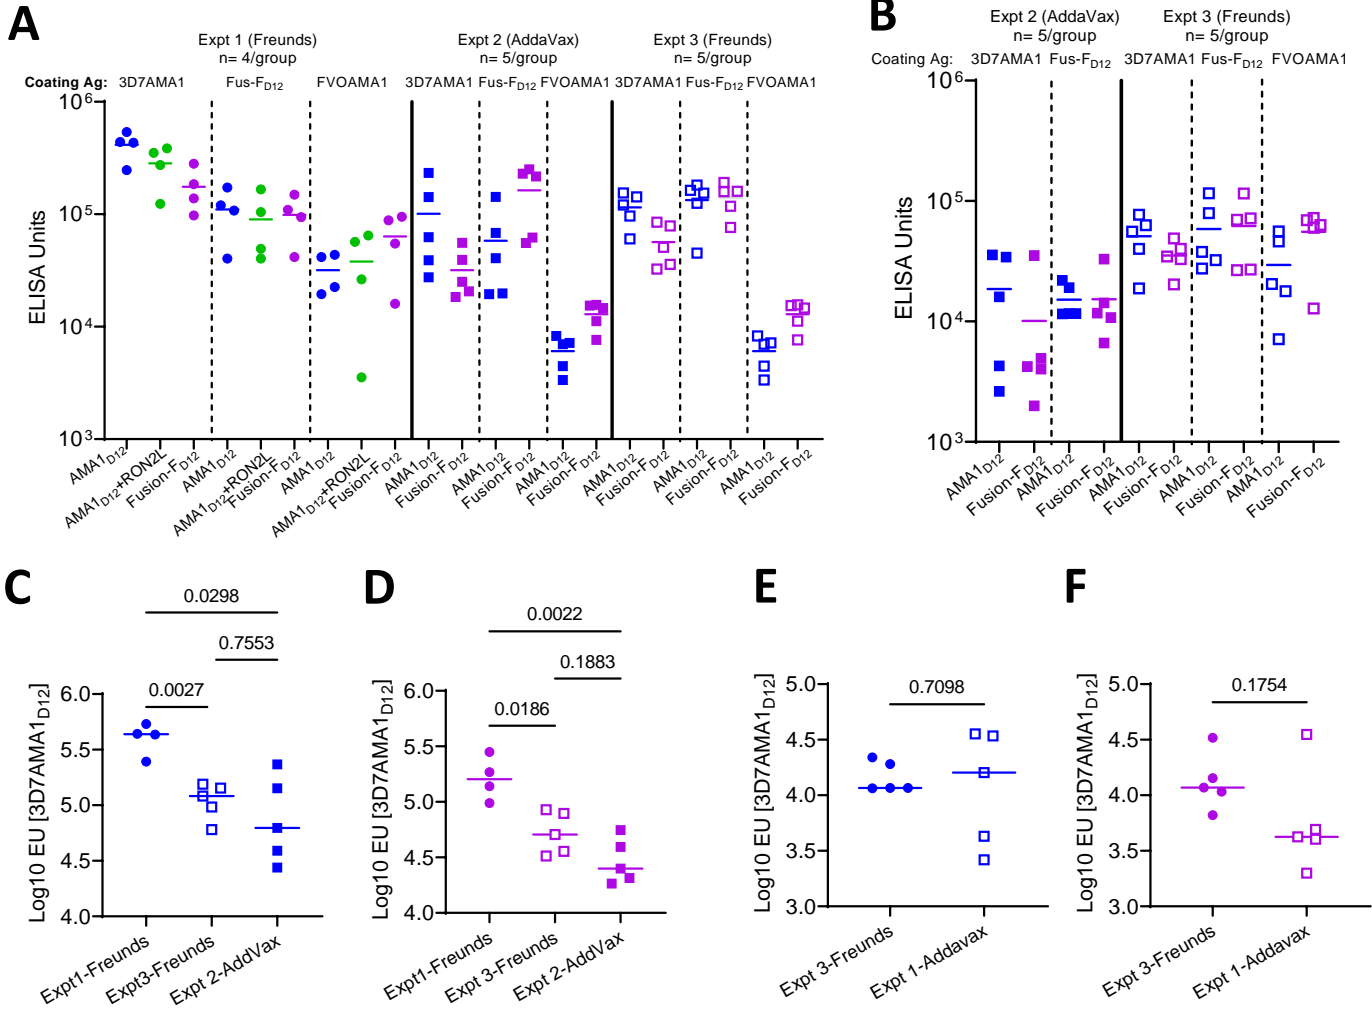

# Suppl Fig 4

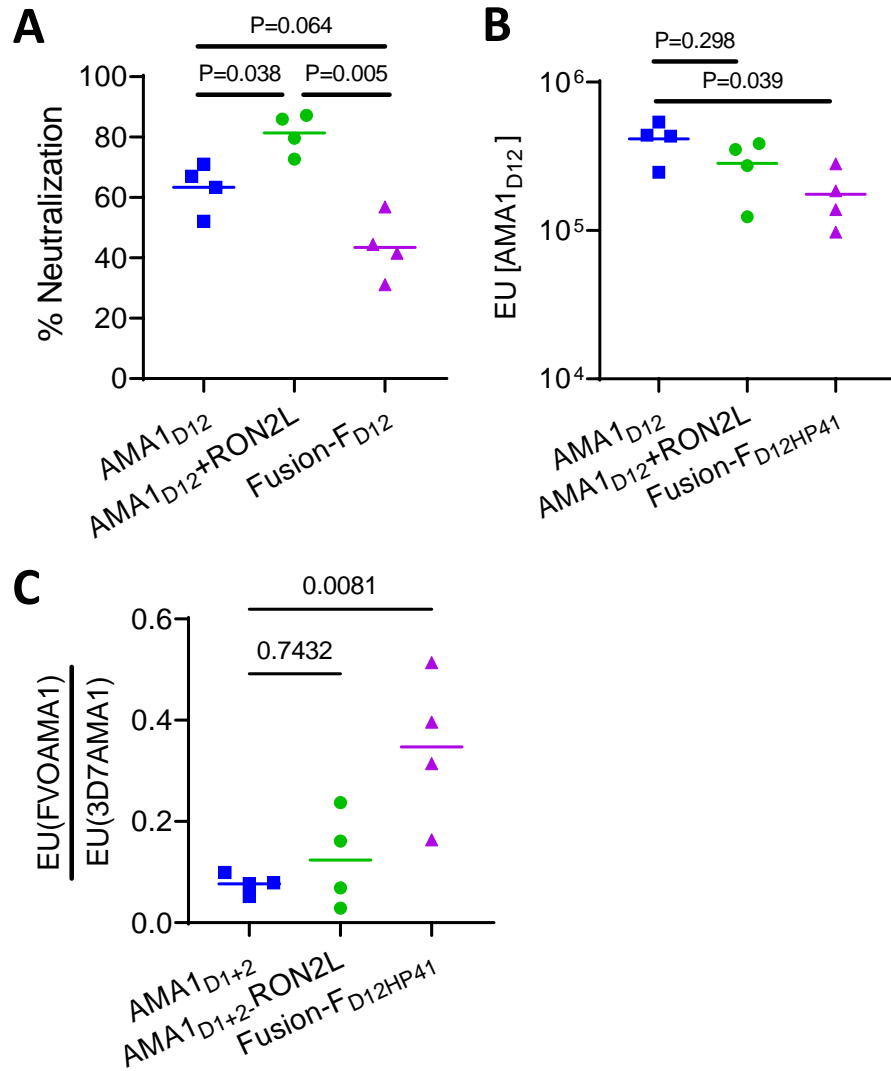



# Suppl Fig 5

**A**

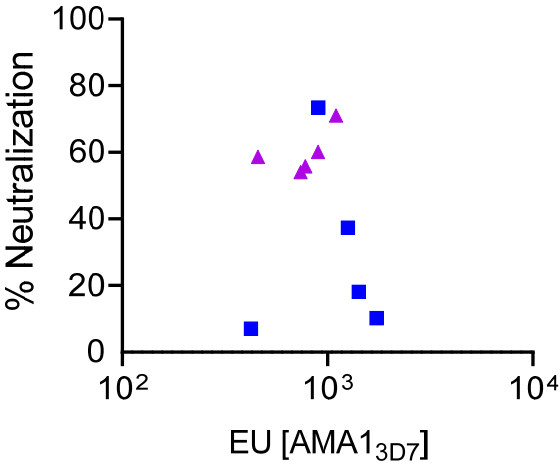

**B**

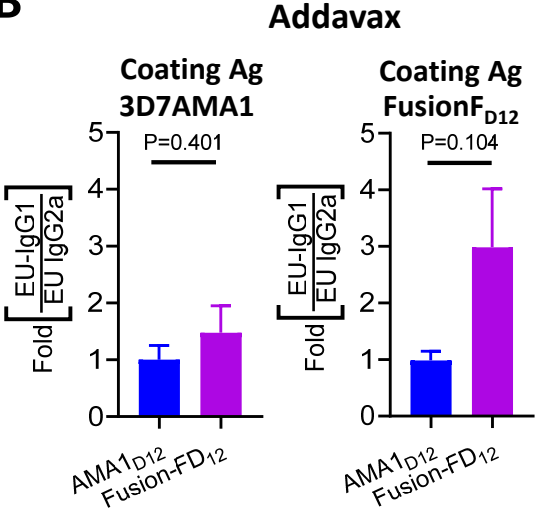

**C**

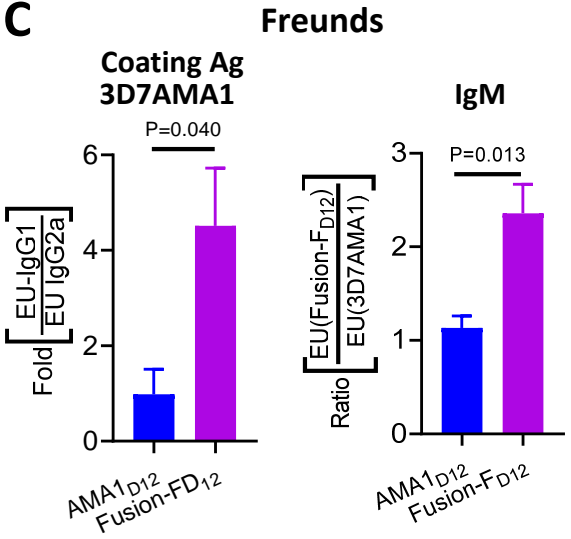

**D**

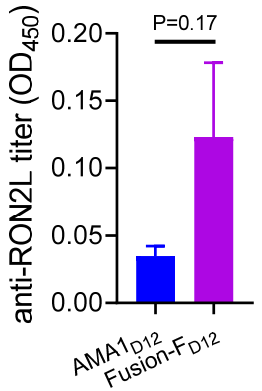

**E**

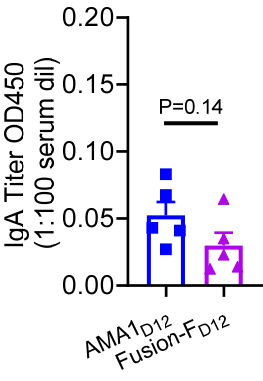

## Suppl Fig 6

**A**

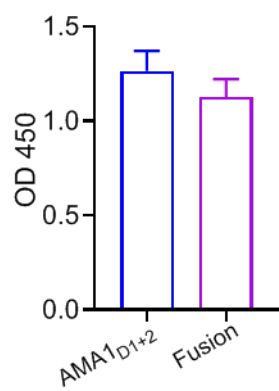

**B**

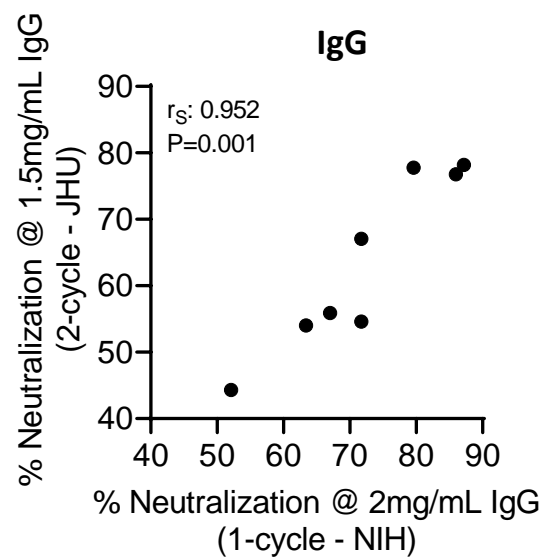

**Supplementary Table 1.** Data collection and refinement statistics

|                                                            | Fusion-F <sub>D12</sub>    |
|------------------------------------------------------------|----------------------------|
| <u>A. Data collection statistics</u>                       |                            |
| Spacegroup                                                 | P3 <sub>1</sub> 2          |
| a, b, c (Å)                                                | 92.50, 92.50, 173.68       |
| $\alpha$ , $\beta$ , $\gamma$ (deg.)                       | 90, 90, 120                |
| Wavelength                                                 | 0.984                      |
| Resolution range (Å)                                       | 58.88 – 1.55 (1.58 – 1.55) |
| Measured reflections                                       | 855,225 (38,498)           |
| Unique reflections                                         | 124,774 (6,114)            |
| Redundancy                                                 | 6.9 (6.3)                  |
| Completeness (%)                                           | 99.7 (100.0)               |
| $I/\sigma(I)$                                              | 11.4 (2.1)                 |
| R <sub>merge</sub>                                         | 0.075 (0.624)              |
| <u>B. Refinement statistics</u>                            |                            |
| Resolution (Å)                                             | 57.89 – 1.55               |
| R <sub>work</sub> / R <sub>free</sub>                      | 0.190/0.219                |
| No. of atoms                                               |                            |
| Protein (A/B)                                              | 2703/2791                  |
| Solvent/Sulfate                                            | 700/5                      |
| Average B-values (Å <sup>2</sup> )                         |                            |
| Protein (A/B)                                              | 25.5/28.9                  |
| Solvent/Sulfate                                            | 36.4/24.6                  |
| r.m.s. deviation from ideality                             |                            |
| Bond lengths (Å)                                           | 0.008                      |
| Bond angles (deg.)                                         | 1.14                       |
| Ramachandran statistics (%)                                |                            |
| Most favoured                                              | 98.0                       |
| Allowed                                                    | 2.0                        |
| Disallowed                                                 | 0.0                        |
| Values in parentheses are for the highest resolution shell |                            |
